# Supplementary material for: CD8+ Granzyme B+–Mediated Tissue Injury vs. CD4+IFNγ+–Mediated Parasite Killing in Human Cutaneous Leishmaniasis
Source: PubMed Central journal article supplement — J Invest Dermatol. 2013 Feb 14;133(6):1533–40. doi: 10.1038/jid.2013.4 (PMC3667352; doi:10.1038/jid.2013.4), 2013-02-14
Supplement: jid20134x1.pdf [file jid20134x1.pdf]

## SUPPLEMENTAL MATERIAL

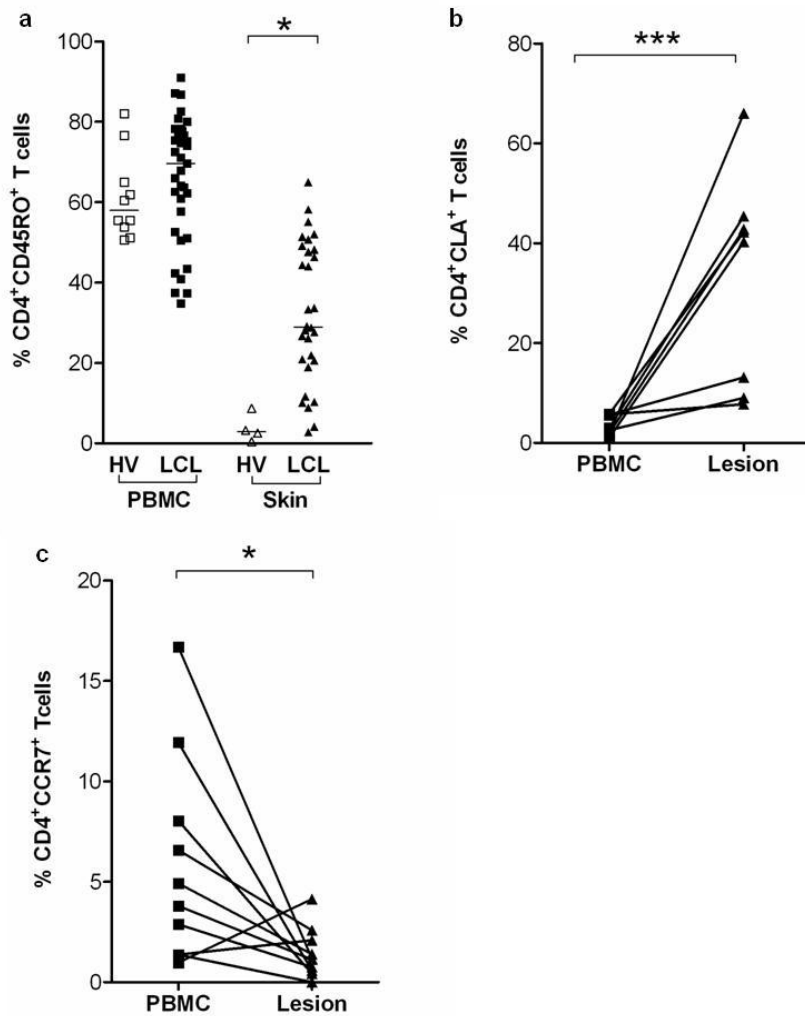

**Figure S1: Expression of homing markers in CD4<sup>+</sup>T cells from CL lesions.**

(a) Ex vivo analysis of CD4<sup>+</sup>CD45RO<sup>+</sup>T cells in PBMCs from healthy individuals (n=10, open square), from CL patients (n=35, closed square) and in skin biopsies from healthy controls (n=4, open triangles) and lesions (n=30, closed triangles) from CL patients. (b-c) Ex vivo analysis of homing markers (CLA and CCR7) in the PBMC (closed square) and lesion cells (closed triangles) from CL patients (n=9). Each symbol represents one individual and the lines represent results obtained in a same patient. \*p < 0.05, \*\*\*p < 0.001. Statistical comparisons were done using the Mann Whitney U-test.

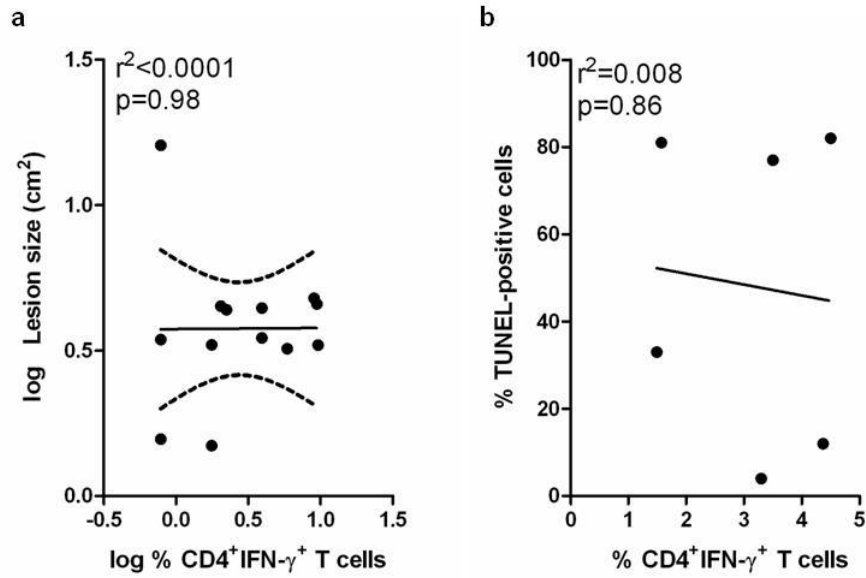

Figure S2: (a) Correlation analysis between frequency of CD4<sup>+</sup>IFN- $\gamma$ <sup>+</sup>T cells and lesion size and (b) between percentage of CD4<sup>+</sup>IFN- $\gamma$ <sup>+</sup>T cells in the tissue and the percentage of TUNEL-positive cells. Statistical comparisons were done using the Spearman's ( $r^2$ ) rank.
